# Supplementary material for: Itraconazole improves survival outcomes in patients with colon cancer by inducing autophagic cell death and inhibiting transketolase expression
Source: PubMed Central journal article supplement — Oncol Lett. 2021 Sep 8;22(5):768. doi: 10.3892/ol.2021.13029 (PMC8442143; doi:10.3892/ol.2021.13029), 2021-09-08

Figure S1. 3-MA induces the apoptosis of COLO 205 cells. COLO 205 cells were treated with 5 mM, 3-MA and 50  $\mu$ M itraconazole for 24 h and cell viability was assessed via the MTT assay. \*P<0.05. 3-MA, 3-methyladenine.

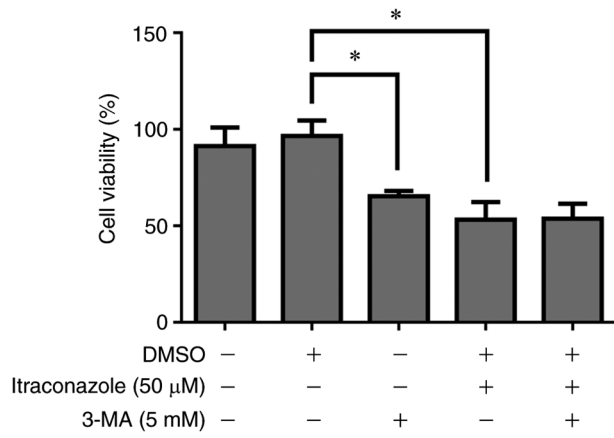

Supplement: Supplementary_Data.pdf [file Supplementary_Data.pdf]
